# Supplementary material for: Association of Prenatal Exposure to Ambient and Traffic-Related Air Pollution With Newborn Thyroid Function: Findings From the Children’s Health Study
Source: PubMed Central journal article supplement (PMC6324507; doi:10.1001/jamanetworkopen.2018.2172), 2018-09-14
Supplement: jamanetwopen-1-e182172-s001.pdf [file jamanetwopen-1-e182172-s001.pdf]

## Supplementary Online Content

Howe CG, Eckel SP, Habre R, et al. Association of Prenatal Exposure to Ambient and Traffic-Related Air Pollution With Newborn Thyroid Function: Findings From the Children's Health Study. *JAMA Netw Open*. 2018;1(5):e182172. doi:10.1001/jamanetworkopen.2018.2172

eMethods. Additional Information on Prenatal Air Pollution Exposure Assignments.

eTable 1. Characteristics of Preterm Newborns (n = 170)

eTable 2. Comparison of Ordinary Least Squares and Robust Linear Regression Results

eTable 3. Sensitivity Analyses for Associations between Prenatal Particulate Matter Exposures and Newborn TT4

eTable 4. Variance Inflation Factors for Three-Pollutant Models

eTable 5. Two-Pollutant Models for Associations between Pregnancy Averages of Air Pollutants and Newborn Total Thyroxine

eFigure 1. Spearman Correlations between Pregnancy Averages of Air Pollutants.

eFigure 2. Box and Whisker Plots of Particulate Matter <2.5  $\mu\text{m}$  (PM<sub>2.5</sub>) Across Pregnancy

eFigure 3. Box and Whisker Plots of Particulate Matter <10  $\mu\text{m}$  (PM<sub>10</sub>) Across Pregnancy

eFigure 4. Box and Whisker Plots of Nitrogen Dioxide (NO<sub>2</sub>) Across Pregnancy

eFigure 5. Box and Whisker Plots of Ozone (O<sub>3</sub>) Across Pregnancy

eFigure 6. Box and Whisker Plots of Total Nitrogen Oxides (NO<sub>x</sub>) Across Pregnancy

eFigure 7. Box and Whisker Plots of Freeway Nitrogen Oxides (NO<sub>x</sub>) Across Pregnancy

eFigure 8. Box and Whisker Plots of Non-Freeway Nitrogen Oxides (NO<sub>x</sub>) Across Pregnancy

eFigure 9. Distributed Lag Model Results for Nitrogen Dioxide (NO<sub>2</sub>)

eFigure 10. Distributed Lag Model Results for Ozone (O<sub>3</sub>)

eFigure 11. Distributed Lag Model Results for Total Nitrogen Oxides (NO<sub>x</sub>)

eFigure 12. Distributed Lag Model Results for Freeway Nitrogen Oxides (NO<sub>x</sub>)

eFigure 13. Distributed Lag Model Results for Non-Freeway Nitrogen Oxides (NO<sub>x</sub>)

eFigure 14. Sensitivity Analyses for Particulate Matter <2.5  $\mu\text{m}$  (PM<sub>2.5</sub>) Distributed Lag Models

eFigure 15. Sensitivity Analyses for Particulate Matter <10  $\mu\text{m}$  (PM<sub>10</sub>) Distributed Lag Models

This supplementary material has been provided by the authors to give readers additional information about their work.

**eMethods. Additional Information on Prenatal Air Pollution Exposure Assignments**

To account for the fact that some newborns were born early in a month, and others late in a month, participants were classified into two categories: those born before the 15<sup>th</sup> of a month versus those born on or after the 15<sup>th</sup> of a month. To account for differences in gestational age at birth, participants were also classified into five gestational age categories: (six months:  $5.5 \leq$  gestational age  $< 6.5$ , seven months:  $6.5 \leq$  gestational age  $< 7.5$ , eight months:  $7.5 \leq$  gestational age  $< 8.5$ , nine months:  $8.5 \leq$  gestational age  $< 9.5$ , ten months:  $9.5 \leq$  gestational age  $< 10.5$ ). For babies born early in a month, air pollutant pregnancy averages were calculated by taking the average of monthly air pollutant measures for each month that the participant was *in utero* prior to his/her birth month (e.g. for a baby born early in a month, with a gestational age at birth of eight months, monthly air pollutant measures for the eight months prior to the birth month were averaged). For babies born late in a month, prenatal air pollutant averages were calculated by taking the average of monthly air pollutant measures for the participant's birth month and each month prior to that that he/she was *in utero* (e.g. for a baby born late in a month, with a gestational age at birth of eight months, the air pollutant measure for the participant's birth month, and measures for the seven months prior to that, were averaged).

**eTable 1. Characteristics of Preterm Newborns (n = 170)**

| <b>Prenatal Air Pollutant Exposures</b>                                        | <b>Mean (SD) or No. (%)</b> | <b>Median (IQR)</b> |
|--------------------------------------------------------------------------------|-----------------------------|---------------------|
| Particulate Matter < 2.5 $\mu\text{m}$ , $\mu\text{g}/\text{m}^3$ <sup>a</sup> | 21.1 (8.2)                  | 23.0 (14.5-27.7)    |
| Particulate Matter < 10 $\mu\text{m}$ , $\mu\text{g}/\text{m}^3$               | 41.5 (11.7)                 | 41.1 (37.0-48.1)    |
| Nitrogen Dioxide, parts per billion (ppb)                                      | 29.2 (11.1)                 | 31.2 (21.7-36.5)    |
| Ozone, ppb                                                                     | 44.3 (13.1)                 | 42.1 (33.4-53.2)    |
| Total Nitrogen Oxides (NO <sub>x</sub> ), ppb <sup>b</sup>                     | 29.0 (28.9)                 | 22.7 (10.7-40.4)    |
| Freeway NO <sub>x</sub> , ppb <sup>b</sup>                                     | 18.9 (25.8)                 | 11.4 (3.3-24.8)     |
| Non-Freeway NO <sub>x</sub> , ppb <sup>b</sup>                                 | 10.0 (7.4)                  | 8.2 (4.7-14.6)      |
| <b>Newborn and Pregnancy Characteristics</b>                                   |                             |                     |
| Age at blood spot collection, hours                                            | 38 (38)                     | 24 (17-41)          |
| Time from blood spot collection until TT4 analysis, days                       | 3 (2)                       | 3 (2-4)             |
| Heel stick total thyroxine (TT4), $\mu\text{g}/\text{dl}$                      | 14.6 (4.9)                  | 14.5 (11.5-17.2)    |
| Gestational age, days                                                          | 244 (15)                    | 250 (239-254)       |
| Sex                                                                            |                             |                     |
| Male                                                                           | 86 (50.6)                   |                     |
| Female                                                                         | 84 (49.4)                   |                     |
| Race/Ethnicity                                                                 |                             |                     |
| Hispanic white                                                                 | 113 (66.5)                  |                     |
| Non-Hispanic white                                                             | 39 (22.9)                   |                     |
| Black                                                                          | 7 (4.1)                     |                     |
| Other                                                                          | 11 (6.5)                    |                     |
| Season of birth                                                                |                             |                     |
| Warm                                                                           | 101 (59.4)                  |                     |
| Cool                                                                           | 69 (40.6)                   |                     |
| Mode of Delivery                                                               |                             |                     |
| Vaginal                                                                        | 137 (80.6)                  |                     |
| Caesarean section                                                              | 33 (19.4)                   |                     |
| Pregnancy Complication <sup>d</sup>                                            |                             |                     |
| Yes                                                                            | 32 (18.8)                   |                     |
| No                                                                             | 138 (81.2)                  |                     |
| Labor Duration                                                                 |                             |                     |
| Precipitous (<3 hours)                                                         | 0 (0.0)                     |                     |
| Normal (3-20 hours)                                                            | 170 (100.0)                 |                     |

| <b>Prenatal Air Pollutant Exposures</b>                 | <b>Mean (SD) or No. (%)</b> | <b>Median (IQR)</b> |
|---------------------------------------------------------|-----------------------------|---------------------|
| Prolonged (>20 hours)                                   | 0 (0.0)                     |                     |
| Principal Payment Source for Prenatal Care <sup>e</sup> |                             |                     |
| None or government                                      | 83 (48.8)                   |                     |
| Health insurance                                        | 80 (47.1)                   |                     |
| Other                                                   | 7 (4.1)                     |                     |
| <b>Maternal and Family Characteristics</b>              |                             |                     |
| Age, years                                              | 26 (6)                      | 26 (20-30)          |
| Education                                               |                             |                     |
| Completed at least high school                          | 104 (61.2)                  |                     |
| Did not complete high school                            | 66 (38.8)                   |                     |
| Maternal Smoking Status During Pregnancy                |                             |                     |
| Ever smoked during pregnancy                            | 17 (10.0)                   |                     |
| Never smoked during pregnancy                           | 153 (90.0)                  |                     |
| Paternal Smoking Status During Pregnancy                |                             |                     |
| Ever smoked during the pregnancy                        | 29 (17.1)                   |                     |
| Never smoked during the pregnancy                       | 137 (80.6)                  |                     |
| Did not report                                          | 4 (2.4)                     |                     |
| Parity                                                  |                             |                     |
| Parous                                                  | 100 (58.8)                  |                     |
| Nulliparous                                             | 70 (41.2)                   |                     |
| Total Household Income                                  |                             |                     |
| <\$7,500                                                | 8 (4.7)                     |                     |
| \$7,500-\$14,999                                        | 13 (7.6)                    |                     |
| \$15,000-\$29,999                                       | 33 (19.4)                   |                     |
| \$30,000-\$49,999                                       | 26 (15.3)                   |                     |
| \$50,000-\$74,999                                       | 21 (12.4)                   |                     |
| \$75,000-\$99,999                                       | 14 (8.2)                    |                     |
| ≥\$100,000                                              | 18 (10.6)                   |                     |
| Don't Know or Did Not Report                            | 37 (21.8)                   |                     |

**eTable 2. Comparison of Ordinary Least Squares and Robust Linear Regression Results<sup>a</sup>**

| Pollutant                                          | Ordinary Least Squares Regression |                    | Robust Linear Regression |                    |
|----------------------------------------------------|-----------------------------------|--------------------|--------------------------|--------------------|
|                                                    | $\beta$ (95% CI)                  | P                  | $\beta$ (95% CI)         | P                  |
| Particulate Matter < 2.5 $\mu\text{m}$ , n = 2046  | 1.2 (0.5, 1.8)                    | $4 \times 10^{-4}$ | 1.2 (0.5, 1.8)           | $8 \times 10^{-4}$ |
| Particulate Matter < 10 $\mu\text{m}$ , n = 2050   | 1.5 (0.9, 2.1)                    | $2 \times 10^{-7}$ | 1.5 (1.0, 2.1)           | $7 \times 10^{-8}$ |
| Nitrogen Dioxide, n = 2050                         | 0.7 (0.1, 1.3)                    | 0.02               | 0.5 (-0.08, 1.1)         | 0.07               |
| Ozone, n = 2050                                    | 0.3 (-0.3, 0.9)                   | 0.34               | 0.3 (-0.3, 0.8)          | 0.36               |
| Total Nitrogen Oxides (NO <sub>x</sub> ), n = 1989 | 0.0 (-0.4, 0.5)                   | 0.91               | -0.1 (-0.5, 0.4)         | 0.77               |
| Freeway NO <sub>x</sub> , n = 1989                 | 0.0 (-0.4, 0.5)                   | 0.82               | -0.1 (-0.5, 0.3)         | 0.79               |
| Non-Freeway NO <sub>x</sub> , n = 1989             | -0.1 (-0.5, 0.4)                  | 0.76               | 0.0 (-0.5, 0.4)          | 0.88               |

<sup>a</sup>Associations between pregnancy averages of air pollutants and newborn total thyroxine (TT4) concentration, adjusting for baby's sex, baby's race/ethnicity, gestational age at birth, season of birth, maternal parity, maternal age, maternal education, maternal tobacco smoke use during pregnancy, age at newborn blood spot collection, and the community of the participant at recruitment. Effect estimates represent differences in newborn TT4 ( $\mu\text{g/dL}$ ) for a 2 SD difference in the pollutant.

**eTable 3. Sensitivity Analyses for Associations<sup>a</sup> between Prenatal Particulate Matter Exposures and Newborn TT4**

| Model                                                                                            | PM <sub>2.5</sub> |                |                        | PM <sub>10</sub> |                |                        |
|--------------------------------------------------------------------------------------------------|-------------------|----------------|------------------------|------------------|----------------|------------------------|
|                                                                                                  | n                 | β (95% CI)     | P                      | n                | β (95% CI)     | P                      |
| Primary Analysis                                                                                 | 2046              | 1.2 (0.5, 1.8) | 3.7 x 10 <sup>-4</sup> | 2050             | 1.5 (0.9, 2.1) | 2.3 x 10 <sup>-7</sup> |
| Restricted to Full-/Late-Term Pregnancies                                                        | 1876              | 1.5 (0.8, 2.1) | 2.0 x 10 <sup>-5</sup> | 1880             | 1.7 (1.1, 2.3) | 3.2 x 10 <sup>-8</sup> |
| Restricted to Vaginal Births                                                                     | 1624              | 1.0 (0.3, 1.8) | 6.0 x 10 <sup>-3</sup> | 1628             | 1.5 (0.9, 2.2) | 3.8 x 10 <sup>-6</sup> |
| Excluding Newborns Exposed to Tobacco Smoke <i>In Utero</i>                                      | 1901              | 1.3 (0.6, 2.0) | 1.3 x 10 <sup>-4</sup> | 1905             | 1.6 (1.0, 2.2) | 1.1 x 10 <sup>-7</sup> |
| Excluding Pregnancies with Complications <sup>b</sup>                                            | 1852              | 1.3 (0.6, 1.9) | 1.7 x 10 <sup>-4</sup> | 1855             | 1.7 (1.1, 2.3) | 6.3 x 10 <sup>-8</sup> |
| Excluding Pregnancies with Precipitous or Prolonged Labors <sup>c</sup>                          | 2027              | 1.2 (0.5, 1.8) | 4.6 x 10 <sup>-4</sup> | 2030             | 1.5 (0.9, 2.1) | 3.7 x 10 <sup>-7</sup> |
| Excluding Participants Who Moved During Pregnancy                                                | 1776              | 1.5 (0.8, 2.2) | 2.5 x 10 <sup>-5</sup> | 1776             | 1.7 (1.0, 2.3) | 9.5 x 10 <sup>-8</sup> |
| Excluding Participants Residing in Communities with <100 Participants (Alpine and Santa Barbara) | 2027              | 1.2 (0.6, 1.8) | 2.9 x 10 <sup>-4</sup> | 2031             | 1.5 (1.0, 2.1) | 1.8 x 10 <sup>-7</sup> |
| Excluding Participants Whose Bloodspots Were Collected >48 Hours Post-Birth                      | 1894              | 1.2 (0.5, 1.8) | 6.0 x 10 <sup>-4</sup> | 1897             | 1.4 (0.8, 2.4) | 2.7 x 10 <sup>-6</sup> |
| Adjusting for Month, Rather than Season, of Birth                                                | 2046              | 1.0 (0.4, 1.7) | .002                   | 2050             | 1.5 (0.9, 2.1) | 3.0 x 10 <sup>-7</sup> |
| Additionally Adjusting for Temperature at Birth                                                  | 2046              | 1.1 (0.4, 1.7) | .001                   | 2050             | 1.5 (0.9, 2.1) | 2.1 x 10 <sup>-7</sup> |
| Additionally Adjusting for Mode of Delivery                                                      | 2046              | 1.1 (0.5, 1.8) | 5.2 x 10 <sup>-4</sup> | 2050             | 1.5 (0.9, 2.1) | 3.3 x 10 <sup>-7</sup> |
| Additionally Adjusting for Household Income                                                      | 2046              | 1.2 (0.5, 1.8) | 4.3 x 10 <sup>-4</sup> | 2050             | 1.5 (0.9, 2.1) | 3.4 x 10 <sup>-7</sup> |

| Model                                                                            | PM <sub>2.5</sub> |                |                        | PM <sub>10</sub> |                |                        |
|----------------------------------------------------------------------------------|-------------------|----------------|------------------------|------------------|----------------|------------------------|
|                                                                                  | n                 | β (95% CI)     | P                      | n                | β (95% CI)     | P                      |
| Additionally Adjusting for Paternal Smoking Status During Pregnancy              | 2046              | 1.2 (0.5, 1.8) | 3.5 x 10 <sup>-4</sup> | 2050             | 1.5 (0.9, 2.1) | 2.2 x 10 <sup>-7</sup> |
| Additionally Adjusting for Prenatal Care Principal Payment Source <sup>d</sup>   | 2046              | 1.2 (0.5, 1.8) | 3.9 x 10 <sup>-4</sup> | 2050             | 1.5 (0.9, 2.1) | 2.7 x 10 <sup>-7</sup> |
| Additionally Adjusting for Time From Blood Spot Collection Until TT4 Measurement | 2046              | 1.2 (0.5, 1.8) | 4.5 x 10 <sup>-4</sup> | 2050             | 1.5 (0.9, 2.1) | 2.7 x 10 <sup>-7</sup> |

<sup>a</sup>Results are from linear regression models, adjusted for baby's sex, baby's race/ethnicity, gestational age at birth, season of birth (unless otherwise specified), maternal parity, maternal age, maternal education, maternal tobacco smoke use during pregnancy, age at newborn blood spot collection, and the community of the participant at recruitment. Effect estimates represent differences in newborn total thyroxine (TT4) (μg/dL) for a 2 SD difference in the pollutant.

<sup>b</sup>Pre-eclampsia/pregnancy-induced hypertension, eclampsia, chronic hypertension, renal disease, pyelonephritis, anemia, cardiac disease, acute or chronic lung disease, diabetes, Rh sensitization, hemoglobinopathy, uterine bleeding before labor, polyhydramnios/oligohydramnios, incompetent cervix, premature labor, genital herpes, other sexually transmitted diseases, hepatitis B, or rubella.

<sup>c</sup>Precipitous labor defined as <3 hours. Prolonged labor defined as >20 hours.

<sup>d</sup>Principal payment source for prenatal care was categorized into one of three categories: (health insurance, none/government, other).



**eTable 4. Variance Inflation Factors for Three-Pollutant Models<sup>a</sup>**

|                                                                         | Variance Inflation Factor |
|-------------------------------------------------------------------------|---------------------------|
| <b>PM<sub>2.5</sub>, NO<sub>2</sub>, O<sub>3</sub> Model (n = 2046)</b> |                           |
| PM <sub>2.5</sub>                                                       | 4.1                       |
| NO <sub>2</sub>                                                         | 5.4                       |
| O <sub>3</sub>                                                          | 4.2                       |
| <b>PM<sub>10</sub>, NO<sub>2</sub>, O<sub>3</sub> Model (n = 2050)</b>  |                           |
| PM <sub>10</sub>                                                        | 3.3                       |
| NO <sub>2</sub>                                                         | 3.6                       |
| O <sub>3</sub>                                                          | 3.2                       |

<sup>a</sup>Results are from linear regression models, including pregnancy averages of particulate matter < 2.5 μm (PM<sub>2.5</sub>), nitrogen dioxide (NO<sub>2</sub>), and ozone (O<sub>3</sub>) or particulate matter < 10 μm (PM<sub>10</sub>), NO<sub>2</sub>, and O<sub>3</sub> in one regression model. Models were adjusted for baby's sex, baby's race/ethnicity, gestational age at birth, season of birth (unless otherwise specified), maternal parity, maternal age, maternal education, maternal tobacco smoke use during pregnancy, age at newborn blood spot collection, and the community of the participant at recruitment. Effect estimates represent differences in newborn total thyroxine (TT4) (μg/dL) for a 2 SD difference in the pollutant.

**eTable 5. Two-Pollutant Models for Associations<sup>a</sup> Between Pregnancy Averages of Air Pollutants and Newborn Total Thyroxine**

|                                                                                                                 | <b>β (95% CI)</b> | <b>P</b>           | <b>Variance Inflation Factor</b> |
|-----------------------------------------------------------------------------------------------------------------|-------------------|--------------------|----------------------------------|
| <b>Particulate Matter &lt; 2.5 μm (PM<sub>2.5</sub>) and Nitrogen Dioxide (NO<sub>2</sub>) Model (n = 2046)</b> |                   |                    |                                  |
| PM <sub>2.5</sub>                                                                                               | 1.0 (0.3, 1.7)    | 3x10 <sup>-3</sup> | 3.5                              |
| NO <sub>2</sub>                                                                                                 | 0.4 (-0.2, 1.1)   | .18                | 3.1                              |
| <b>PM<sub>2.5</sub> and Ozone (O<sub>3</sub>) Model (n = 2046)</b>                                              |                   |                    |                                  |
| PM <sub>2.5</sub>                                                                                               | 1.3 (0.6, 2.0)    | 5x10 <sup>-3</sup> | 3.9                              |
| O <sub>3</sub>                                                                                                  | -0.2 (-0.9, 0.4)  | .49                | 3.1                              |
| <b>Particulate Matter &lt; 10 μm (PM<sub>10</sub>) and NO<sub>2</sub> Model (n = 2050)</b>                      |                   |                    |                                  |
| PM <sub>10</sub>                                                                                                | 1.4 (0.8, 2.0)    | 3x10 <sup>-6</sup> | 2.8                              |
| NO <sub>2</sub>                                                                                                 | 0.3 (-0.4, 0.9)   | .41                | 3.0                              |
| <b>PM<sub>10</sub> and O<sub>3</sub> Model (n = 2050)</b>                                                       |                   |                    |                                  |
| PM <sub>10</sub>                                                                                                | 1.6 (1.0, 2.2)    | 3x10 <sup>-7</sup> | 2.7                              |
| O <sub>3</sub>                                                                                                  | -0.1 (-0.7, 0.5)  | .65                | 2.7                              |
| <b>NO<sub>2</sub> and O<sub>3</sub> Model (n = 2050)</b>                                                        |                   |                    |                                  |
| NO <sub>2</sub>                                                                                                 | 0.9 (0.3, 1.5)    | 6x10 <sup>-3</sup> | 3.0                              |
| O <sub>3</sub>                                                                                                  | 0.5 (-0.1, 1.1)   | .09                | 2.7                              |

<sup>a</sup>Results are from linear regression models, adjusted for baby's sex, baby's race/ethnicity, gestational age at birth, season of birth (unless otherwise specified), maternal parity, maternal age, maternal education, maternal tobacco smoke use during pregnancy, age at newborn blood spot collection, and the community of the participant at recruitment. Effect estimates represent differences in newborn total thyroxine (μg/dL) for a 2 standard deviation difference in the pollutant.

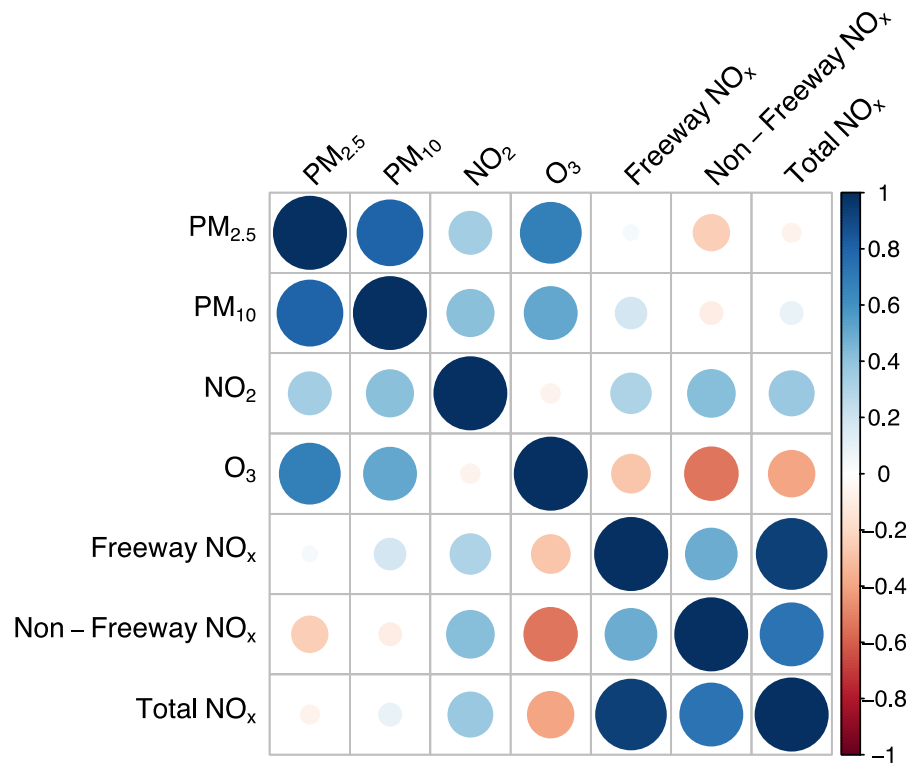

**eFigure 1. Spearman Correlations Between Pregnancy Averages of Air Pollutants.** Darker shades represent stronger correlations. Blue shades indicate positive correlations, while red shades indicate negative correlations, as outlined in corresponding key. n = 1989. Abbreviations: NO<sub>2</sub>, Nitrogen Dioxide; NO<sub>x</sub>, Nitrogen Oxides; O<sub>3</sub>, Ozone; PM<sub>2.5</sub>, Particulate Matter < 2.5 μm; PM<sub>10</sub>, Particulate Matter < 10 μm;

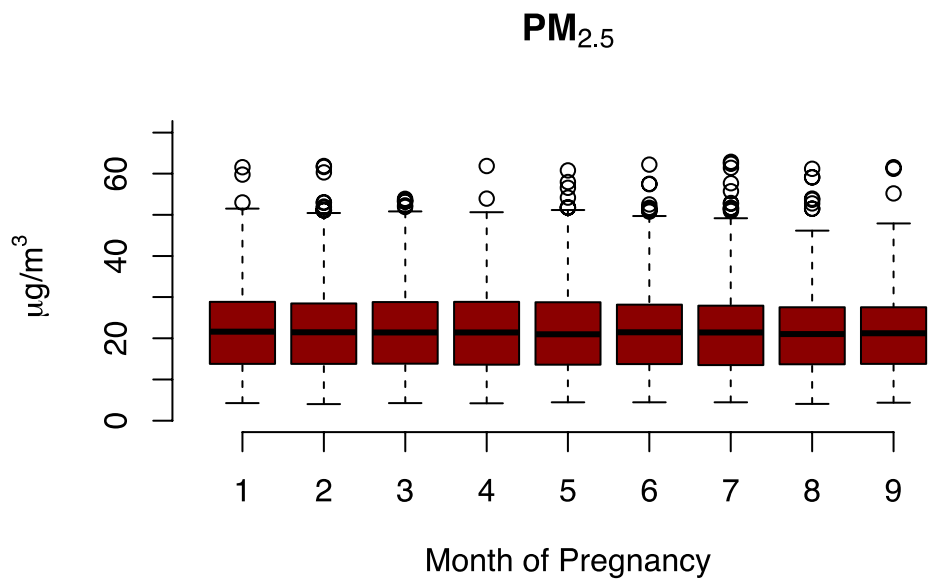

**eFigure 2. Box and Whisker Plots of Particulate Matter < 2.5 µm (PM<sub>2.5</sub>) Across Pregnancy.** Box and whisker plots showing the distribution of PM<sub>2.5</sub> (µg/m<sup>3</sup>) at each of the first nine months of pregnancy. The boxes represent the interquartile ranges for PM<sub>2.5</sub>. The horizontal black line dividing the box represents the median. Lower whiskers represent the first quartile PM<sub>2.5</sub> value - 1.5 x the interquartile range for PM<sub>2.5</sub> at that month. Upper whiskers represent the third quartile PM<sub>2.5</sub> value + 1.5 x the interquartile range for PM<sub>2.5</sub> at that month. Open circles represent PM<sub>2.5</sub> values that are greater than upper whisker PM<sub>2.5</sub> values.

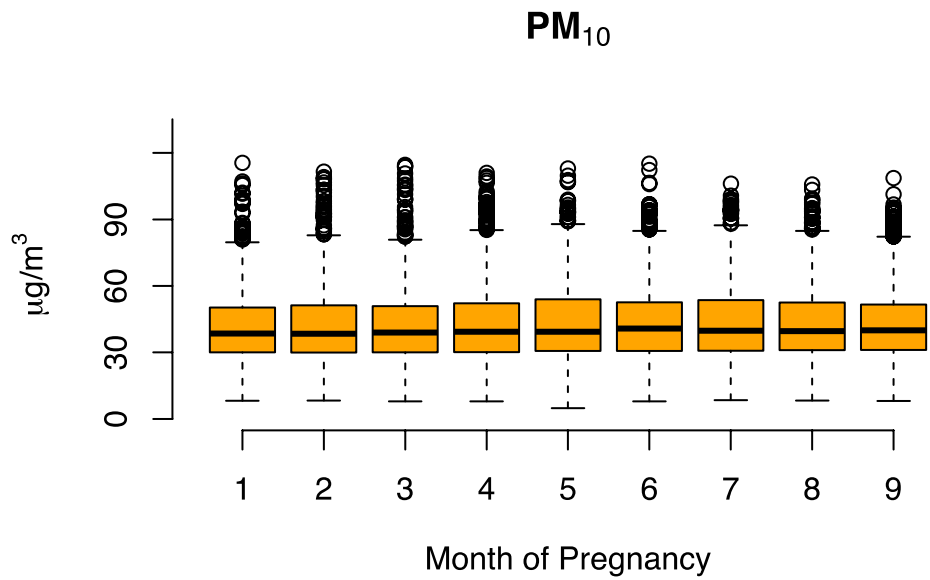

**eFigure 3. Box and Whisker Plots of Particulate Matter < 10 µm (PM<sub>10</sub>) Across Pregnancy.** Box and whisker plots showing the distribution of PM<sub>10</sub> (µg/m<sup>3</sup>) at each of the first nine months of pregnancy. The boxes represent the interquartile ranges for PM<sub>10</sub>. The horizontal black line dividing the box represents the median. Lower whiskers represent the first quartile PM<sub>10</sub> value - 1.5 x the interquartile range for PM<sub>10</sub> at that month. Upper whiskers represent the third quartile PM<sub>10</sub> value + 1.5 x the interquartile range for PM<sub>10</sub> at that month. Open circles represent PM<sub>10</sub> values that are greater than upper whisker PM<sub>10</sub> values.

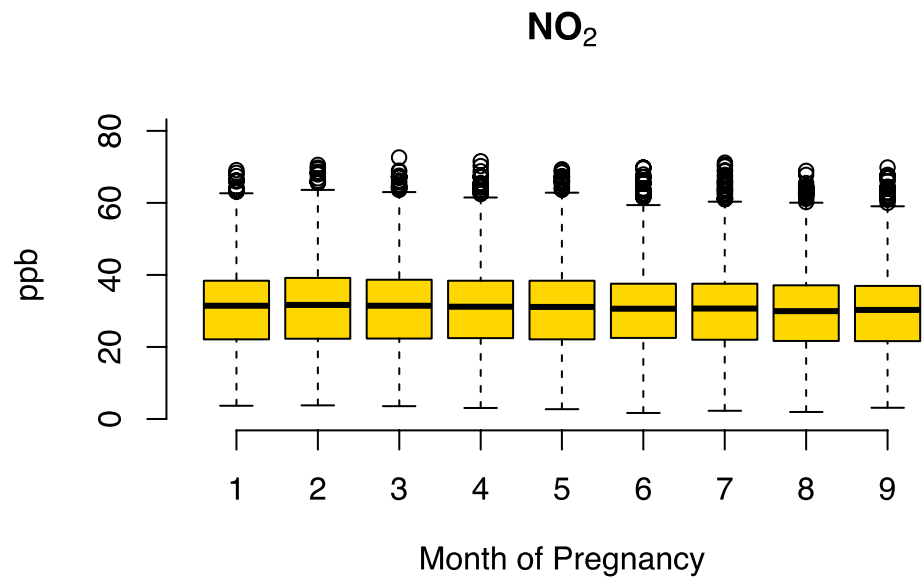

**eFigure 4. Box and Whisker Plots of Nitrogen Dioxide (NO<sub>2</sub>) Across Pregnancy.** Box and whisker plots showing the distribution of NO<sub>2</sub> (parts per billion (ppb)) at each of the first nine months of pregnancy. The boxes represent the interquartile ranges for NO<sub>2</sub>. The horizontal black line dividing the box represents the median. Lower whiskers represent the first quartile NO<sub>2</sub> value - 1.5 x the interquartile range for NO<sub>2</sub> at that month. Upper whiskers represent the third quartile NO<sub>2</sub> value + 1.5 x the interquartile range for NO<sub>2</sub> at that month. Open circles represent NO<sub>2</sub> values that are greater than upper whisker NO<sub>2</sub> values. Abbreviations: ppb, parts per billion.

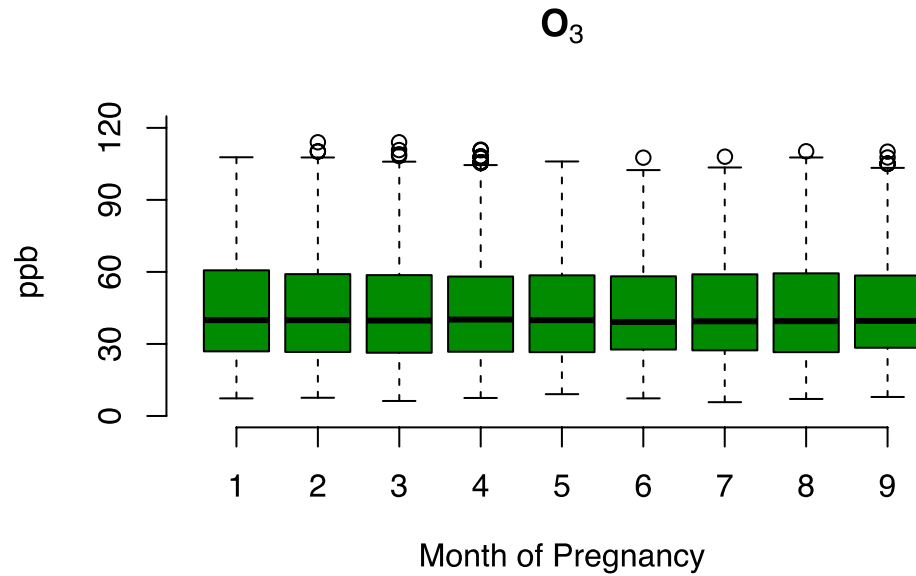

**eFigure 5. Box and Whisker Plots of Ozone (O<sub>3</sub>) Across Pregnancy.** Box and whisker plots showing the distribution of O<sub>3</sub> (parts per billion (ppb)) at each of the first nine months of pregnancy. The boxes represent the interquartile ranges for O<sub>3</sub>. The horizontal black line dividing the box represents the median. Lower whiskers represent the first quartile O<sub>3</sub> value - 1.5 x the interquartile range for O<sub>3</sub> at that month. Upper whiskers represent the third quartile O<sub>3</sub> value + 1.5 x the interquartile range for O<sub>3</sub> at that month. Open circles represent O<sub>3</sub> values that are greater than upper whisker O<sub>3</sub> values. Abbreviations: ppb, parts per billion.

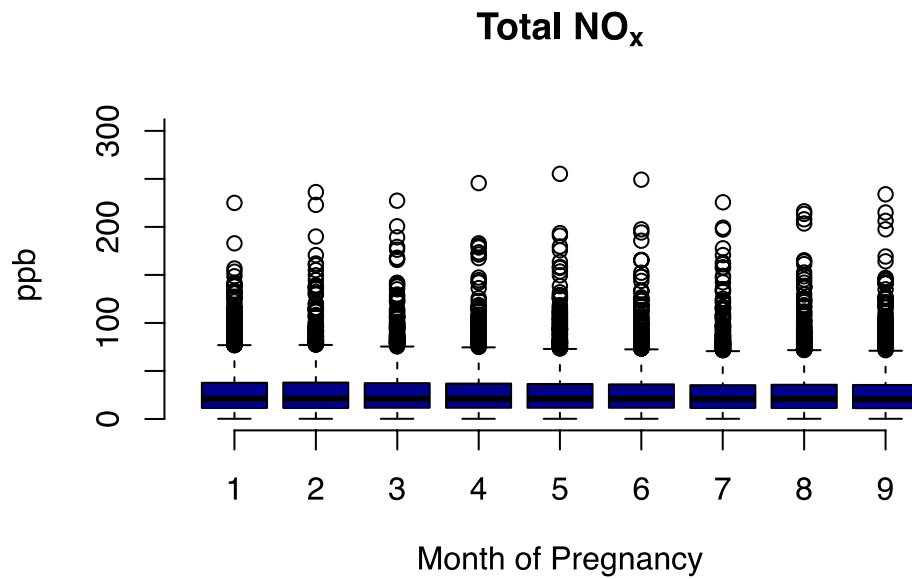

**eFigure 6. Box and Whisker Plots of Total Nitrogen Oxides (NO<sub>x</sub>) Across Pregnancy.** Box and whisker plots showing the distribution of total NO<sub>x</sub> (parts per billion (ppb)) at each of the first nine months of pregnancy. The boxes represent the interquartile ranges for Total NO<sub>x</sub>. The horizontal black line dividing the box represents the median. Lower whiskers represent the first quartile Total NO<sub>x</sub> value - 1.5 x the interquartile range for Total NO<sub>x</sub> at that month. Upper whiskers represent the third quartile Total NO<sub>x</sub> value + 1.5 x the interquartile range for Total NO<sub>x</sub> at that month. Open circles represent Total NO<sub>x</sub> values that are greater than upper whisker Total NO<sub>x</sub> values. Abbreviations: ppb, parts per billion.



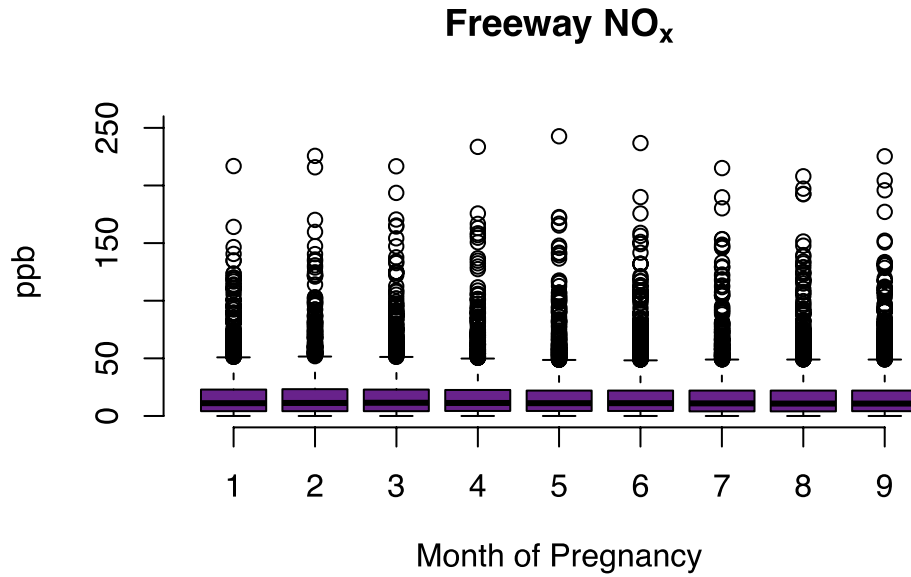

**eFigure 7. Box and Whisker Plots of Freeway Nitrogen Oxides (NO<sub>x</sub>) Across Pregnancy.** Box and whisker plots showing the distribution of freeway NO<sub>x</sub> (parts per billion (ppb)) at each of the first nine months of pregnancy. The boxes represent the interquartile ranges for freeway NO<sub>x</sub>. The horizontal black line dividing the box represents the median. Lower whiskers represent the first quartile freeway NO<sub>x</sub> value - 1.5 x the interquartile range for freeway NO<sub>x</sub> at that month. Upper whiskers represent the third quartile freeway NO<sub>x</sub> value + 1.5 x the interquartile range for freeway NO<sub>x</sub> at that month. Open circles represent freeway NO<sub>x</sub> values that are greater than upper whisker freeway NO<sub>x</sub> values. Abbreviations: ppb, parts per billion.

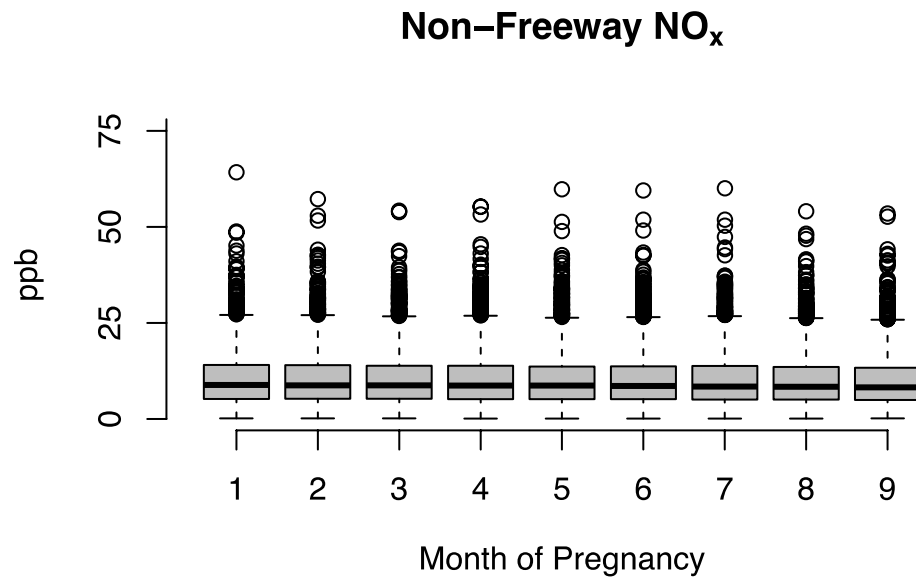

**eFigure 8. Box and Whisker Plots of Non-Freeway Nitrogen Oxides (NO<sub>x</sub>) Across Pregnancy.** Box and whisker plots showing the distribution of non-freeway NO<sub>x</sub> (parts per billion (ppb)) at each of the first nine months of pregnancy. The boxes represent the interquartile ranges for non-freeway NO<sub>x</sub>. The horizontal black line dividing the box represents the median. Lower whiskers represent the first quartile non-freeway NO<sub>x</sub> value - 1.5 x the interquartile range for non-freeway NO<sub>x</sub> at that month. Upper whiskers represent the third quartile non-freeway NO<sub>x</sub> value + 1.5 x the interquartile range for non-freeway NO<sub>x</sub> at that month. Open circles represent non-freeway NO<sub>x</sub> values that are greater than upper whisker non-freeway NO<sub>x</sub> values. Abbreviations: ppb, parts per billion.

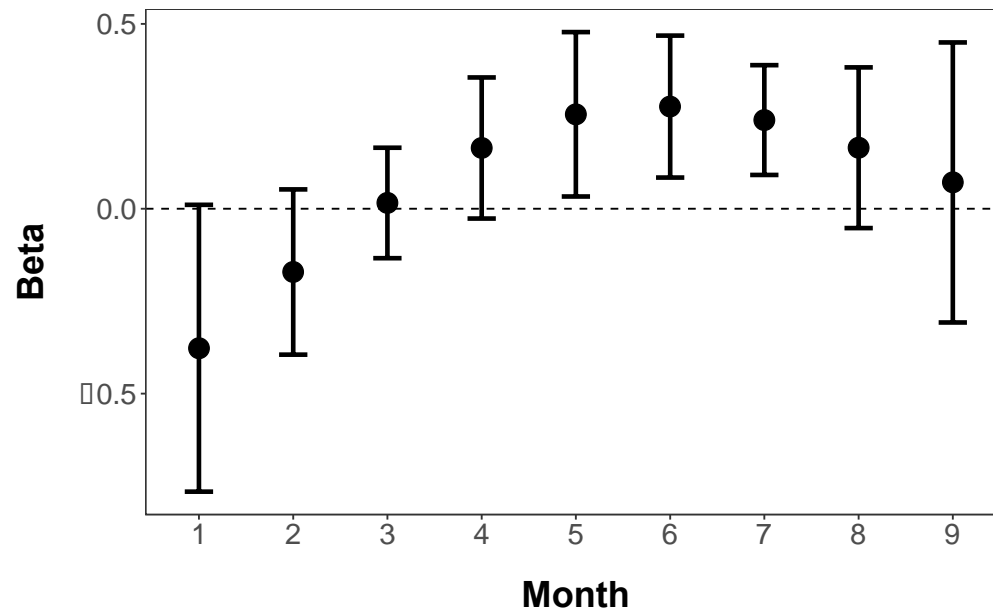

**eFigure 9. Distributed Lag Model Results for Nitrogen Dioxide (NO<sub>2</sub>).** Beta coefficients and 95% confidence intervals from distributed lag models for associations between NO<sub>2</sub> and total thyroxine (TT4) concentrations at birth, adjusted for baby's sex, baby's race/ethnicity, gestational age at birth, season of birth, maternal parity, maternal age, maternal education, maternal tobacco smoke use during pregnancy, age at newborn blood spot collection, and the community of the participant at enrollment, among full-/late-term newborns. A natural cubic spline function with three degrees of freedom was used. Beta coefficients represent the difference in newborn TT4 (μg/dL) for a 2 SD difference in NO<sub>2</sub>. N = 1880.

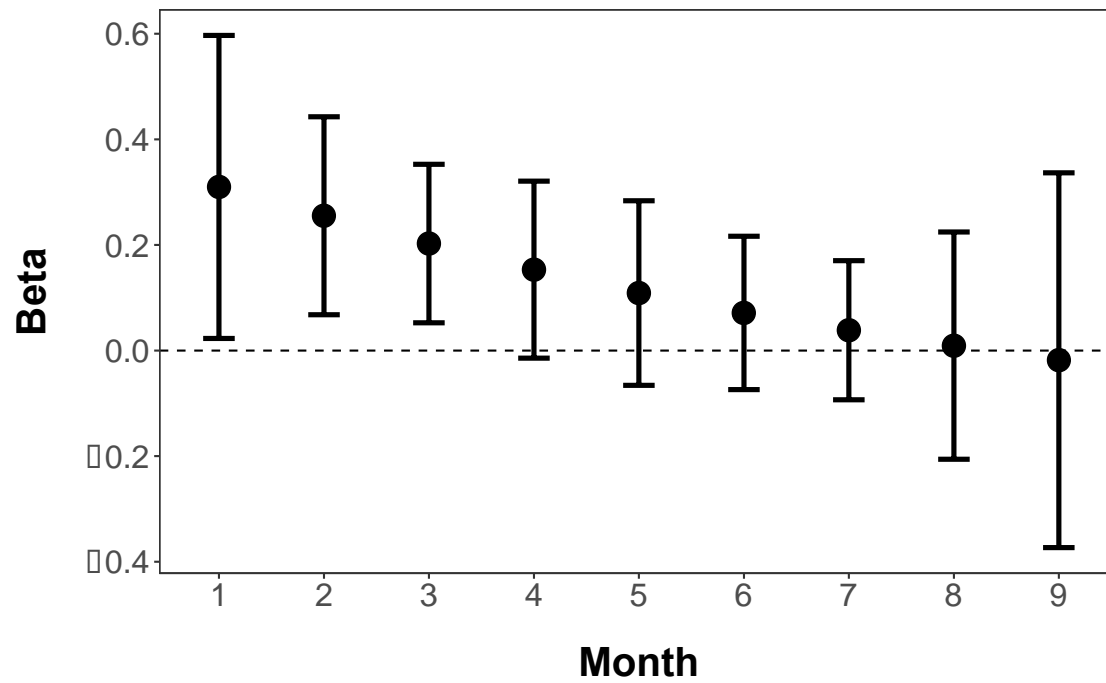

**eFigure 10. Distributed Lag Model Results for Ozone (O<sub>3</sub>).** Beta coefficients and 95% confidence intervals from distributed lag models for associations between O<sub>3</sub> and total thyroxine (TT4) concentrations at birth, adjusted for baby's sex, baby's race/ethnicity, gestational age at birth, season of birth, maternal parity, maternal age, maternal education, maternal tobacco smoke use during pregnancy, age at newborn blood spot collection, and the community of the participant at enrollment, among full-/late-term newborns. A natural cubic spline function with three degrees of freedom was used. Beta coefficients represent the difference in newborn TT4 (μg/dL) for a 2 SD difference in O<sub>3</sub>. N = 1880.

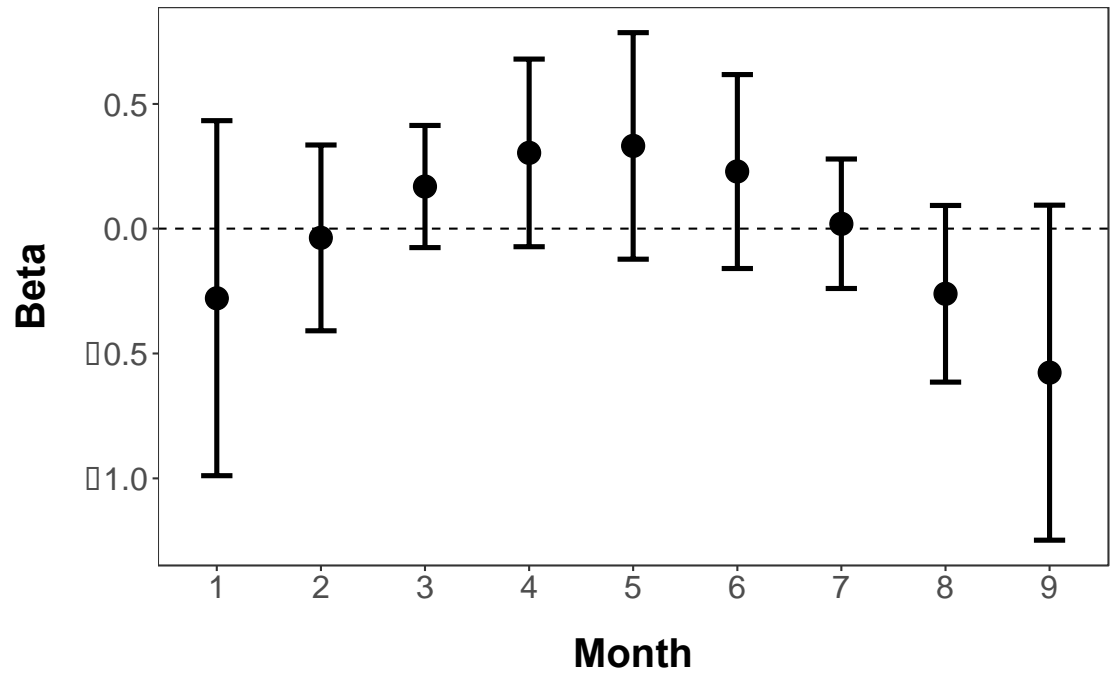

**eFigure 11. Distributed Lag Model Results for Total Nitrogen Oxides (NO<sub>x</sub>).** Beta coefficients and 95% confidence intervals from distributed lag models for associations between total NO<sub>x</sub> and total thyroxine (TT4) concentrations at birth, adjusted for baby's sex, baby's race/ethnicity, gestational age at birth, season of birth, maternal parity, maternal age, maternal education, maternal tobacco smoke use during pregnancy, age at newborn blood spot collection, and the community of the participant at enrollment, among full-/late-term newborns. A natural cubic spline function with three degrees of freedom was used. Beta coefficients represent the difference in newborn TT4 (μg/dL) for a 2 SD difference in total NO<sub>x</sub>. N = 1824.

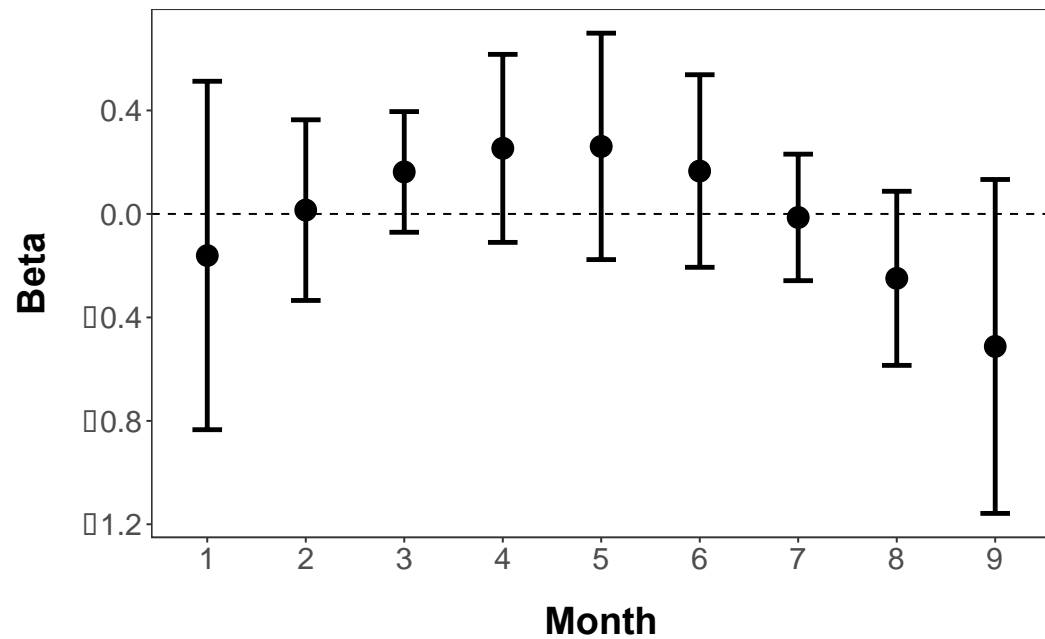

**eFigure 12. Distributed Lag Model Results for Freeway Nitrogen Oxides (NO<sub>x</sub>).** Beta coefficients and 95% confidence intervals from distributed lag models for associations between freeway NO<sub>x</sub> and total thyroxine (TT4) concentrations at birth, adjusted for baby's sex, baby's race/ethnicity, gestational age at birth, season of birth, maternal parity, maternal age, maternal education, maternal tobacco smoke use during pregnancy, age at newborn blood spot collection, and the community of the participant at enrollment, among full-/late-term newborns. A natural cubic spline function with three degrees of freedom was used. Beta coefficients represent the difference in newborn TT4 (μg/dL) for a 2 SD difference in freeway NO<sub>x</sub>. N = 1824.

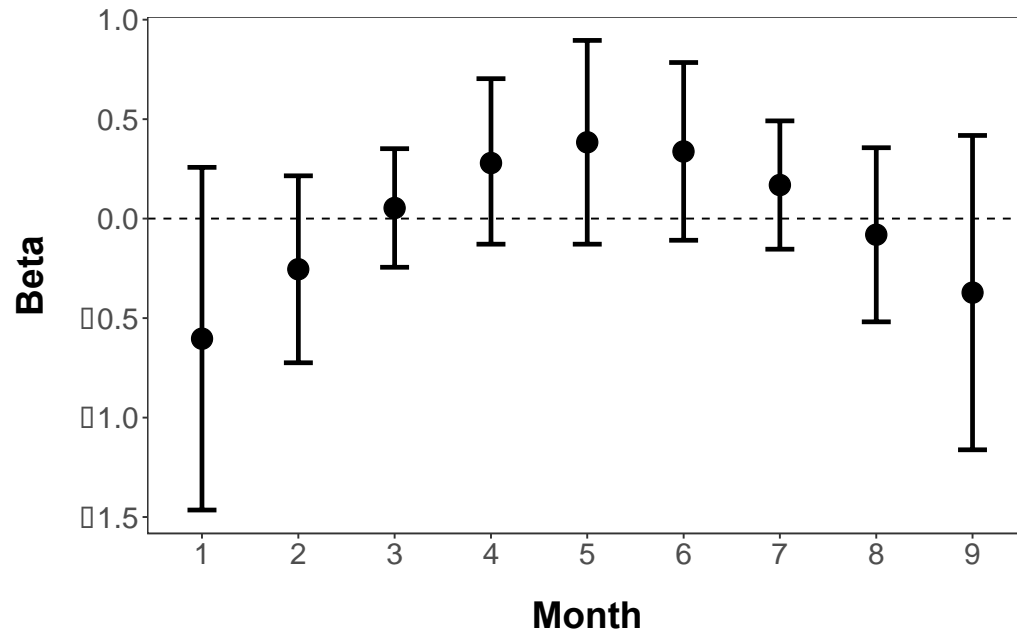

**eFigure 13. Distributed Lag Model Results for Non-Freeway Nitrogen Oxides (NO<sub>x</sub>).** Beta coefficients and 95% confidence intervals from distributed lag models for associations between non-freeway NO<sub>x</sub> and total thyroxine (TT4) concentrations at birth, adjusted for baby's sex, baby's race/ethnicity, gestational age at birth, season of birth, maternal parity, maternal age, maternal education, maternal tobacco smoke use during pregnancy, age at newborn blood spot collection, and the community of the participant at enrollment, among full-/late-term newborns. A natural cubic spline function with three degrees of freedom was used. Beta coefficients represent the difference in newborn TT4 (μg/dL) for a 2 SD difference in non-freeway NO<sub>x</sub>. N = 1824.

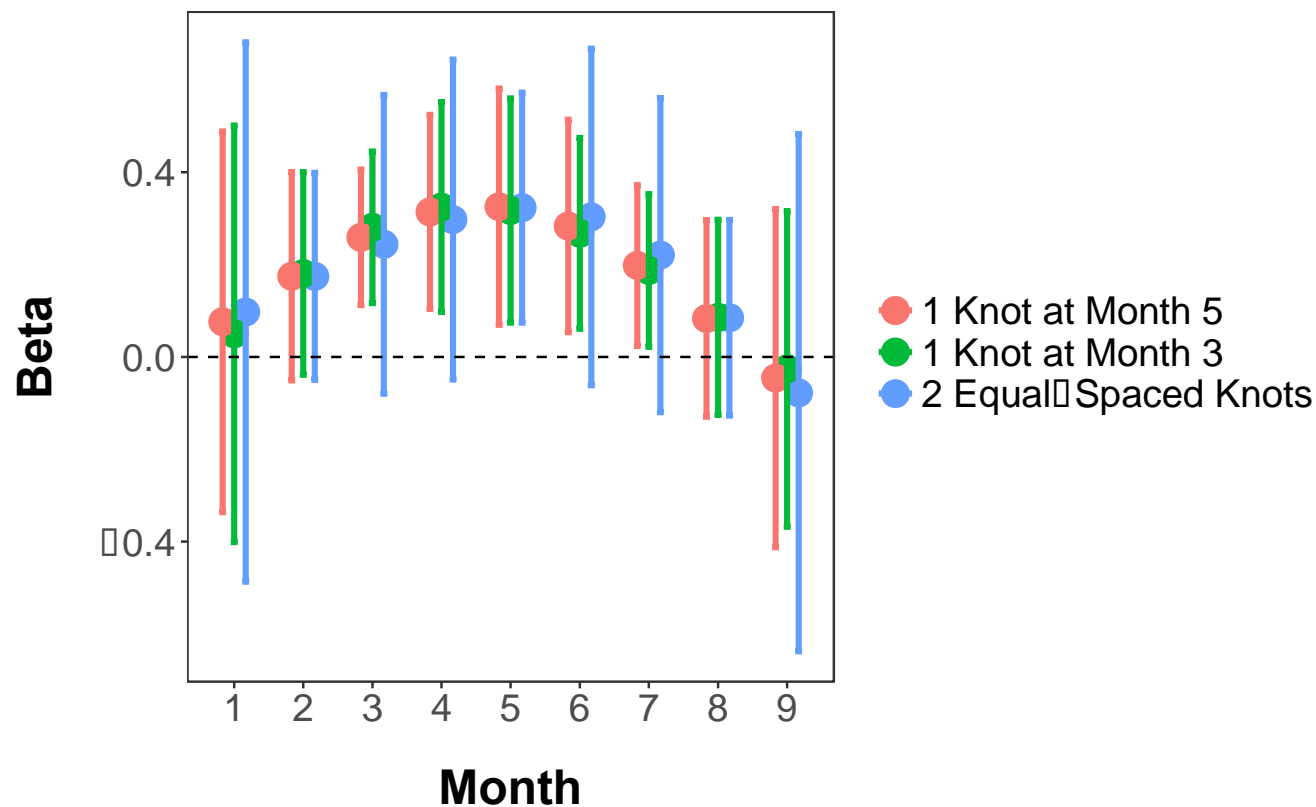

**eFigure 14. Sensitivity Analyses for Particulate Matter < 2.5  $\mu\text{m}$  ( $\text{PM}_{2.5}$ ) Distributed Lag Models.** Comparison of  $\text{PM}_{2.5}$  distributed lag models results using natural cubic splines with 1 knot, placed at the median lag period, month 5 of pregnancy (pink) versus 1 knot, placed at month 3 of pregnancy (green), versus 2 equal-spaced knots: one between months three and four of pregnancy and another between months six and seven of pregnancy (blue). Estimates and corresponding 95% confidence intervals represent the difference in newborn total thyroxine ( $\mu\text{g}/\text{dL}$ ) for a 2 standard deviation difference in  $\text{PM}_{2.5}$ . All models were adjusted for baby's sex, baby's race/ethnicity, gestational age at birth, season of birth, maternal parity, maternal age, maternal education, maternal tobacco smoke use during pregnancy, age at newborn blood spot collection, and the community of the participant at recruitment, among full-/late-term newborns.  $n = 1876$ .



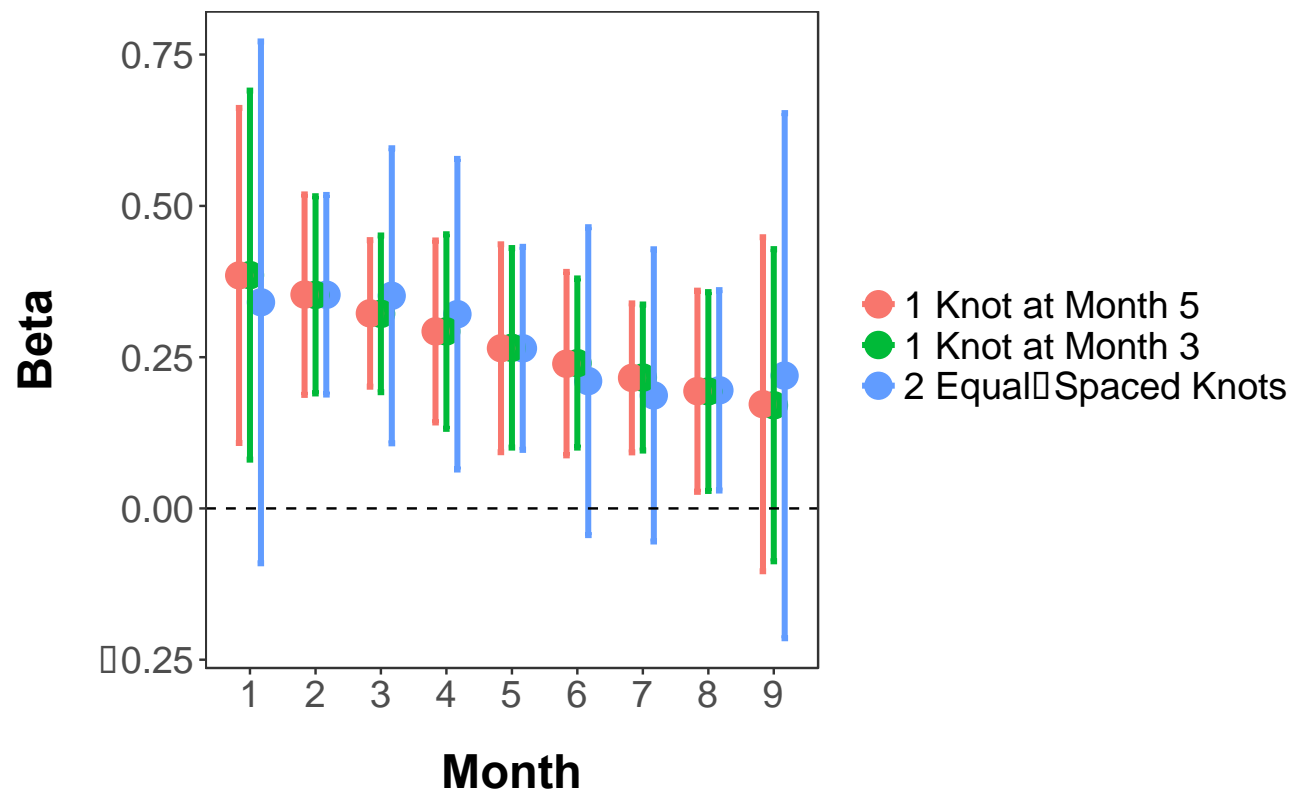

**eFigure 15. Sensitivity Analyses for Particulate Matter < 10  $\mu\text{m}$  ( $\text{PM}_{10}$ ) Distributed Lag Models.** Comparison of  $\text{PM}_{10}$  distributed lag models results using natural cubic splines with 1 knot, placed at the median lag period, month 5 of pregnancy (pink) versus 1 knot, placed at month 3 of pregnancy (green), versus 2 equal-spaced knots: one between months three and four of pregnancy and another between months six and seven of pregnancy (blue). Estimates and corresponding 95% confidence intervals represent the difference in newborn total thyroxine ( $\mu\text{g/dL}$ ) for a 2 standard deviation difference in  $\text{PM}_{10}$ . All models were adjusted for baby's sex, baby's race/ethnicity, gestational age at birth, season of birth, maternal parity, maternal age, maternal education, maternal tobacco smoke use during pregnancy, age at newborn blood spot collection, and the community of the participant at recruitment, among full-/late-term newborns.  $n = 1880$ .
